# Supplementary material for: ‘GaI’: A new reagent for chemo- and diastereoselective C–C bond forming reactions
Source: Royal Society of Chemistry journal article supplement (doi:10.1039/b613669a), 2006-12-15
Supplement: b613669a.pdf [file b613669a.pdf]

**‘Gal’: A New Reagent for Chemo- and Diastereoselective C-C Bond Forming Reactions**

**Shaun P. Green, Cameron Jones\*, Andreas Stasch and Richard P. Rose**

**Supplementary Material**

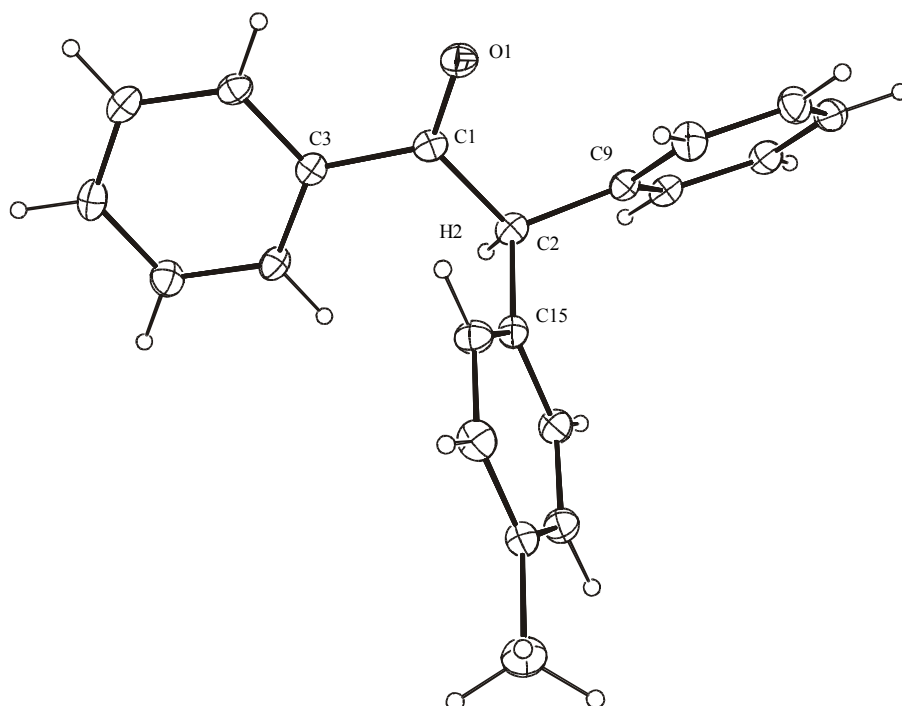

**Figure S1.** Molecular structure of **10** (25% thermal ellipsoids are shown).

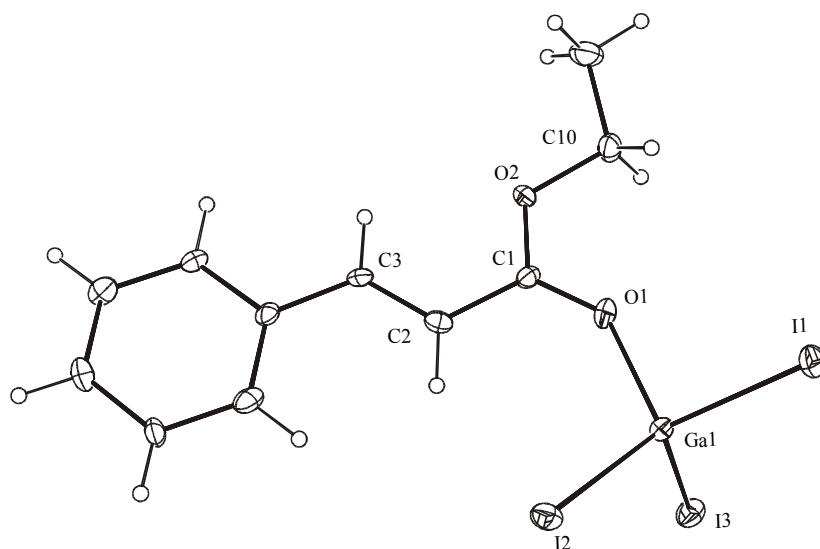

**Figure S2.** Molecular structure of **14** (25% thermal ellipsoids are shown).
